# Supplementary material
Source: Springer Nature journal article supplement (https://www.springermedizin.de/resource/supplementary/12936_2009_930_MOESM2_ESM.pdf/9548560)

*P. vivax*

*P. falciparum*

**M**

**10<sup>-5</sup>**

**10<sup>-4</sup>**

**10<sup>-3</sup>**

**10<sup>-2</sup>**

**10<sup>-1</sup>**

**1**

**10<sup>-5</sup>**

**10<sup>-4</sup>**

**10<sup>-3</sup>**

**10<sup>-2</sup>**

**10<sup>-1</sup>**

**1**

**M**

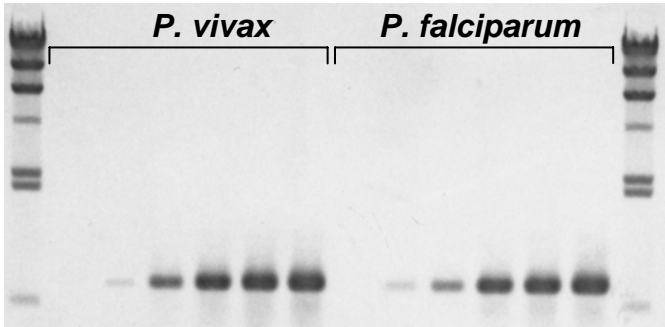

Supplement: MOESM2 [file 9548560]
